# Supplementary material for: Gold nanoclusters Cys-Au NCs as selective fluorescent probes for “on–off–on” detection of Fe3+ and ascorbic acid
Source: Royal Society of Chemistry journal article supplement (doi:10.1039/d3ra00410d), 2023-01-01
Supplement: d3ra00410d1.pdf [file d3ra00410d1.pdf]

## Supplementary data

### Gold nanoclusters Cys-Au NCs as Selective fluorescent probes for "On-Off-On" detection of Fe<sup>3+</sup> and Ascorbic Acid

Wenjie Luo<sup>a,1</sup>, Changxu Wang<sup>b,1</sup>, Jieshu Min<sup>a</sup>, Huiyu Luo<sup>c,\*</sup>

<sup>a</sup> Department of Pharmacy, Xiangyang No.1 People's Hospital, Hubei University of Medicine, Xiangyang, 441000, China

<sup>b</sup> Department of Pharmacy, Taihe Hospital, Hubei University of Medicine, Shiyan, 442000, China

<sup>c</sup> Department of Anesthesiology, Xiangyang Key Laboratory of Movement Disorders, Xiangyang No.1 People's Hospital, Hubei University of Medicine, Xiangyang, 441000, China

\* Corresponding author.

E-mail address: [603983267@qq.com](mailto:603983267@qq.com) (H. Luo).

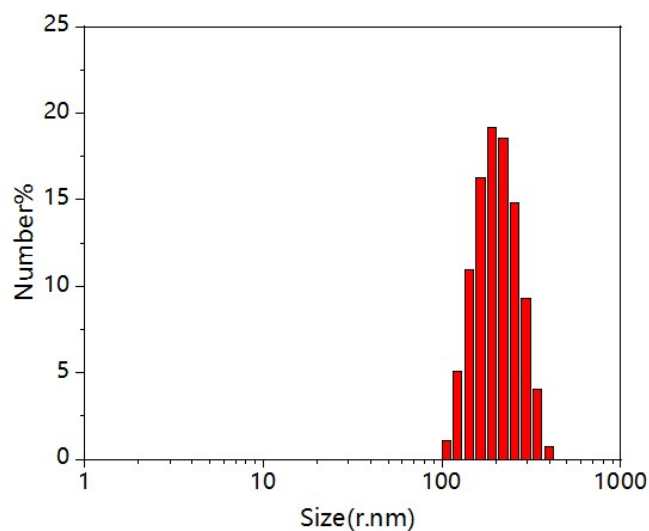

**Fig. S1.** Size distribution of fluorescent Au nanoclusters in aqueous solution determined by DLS.

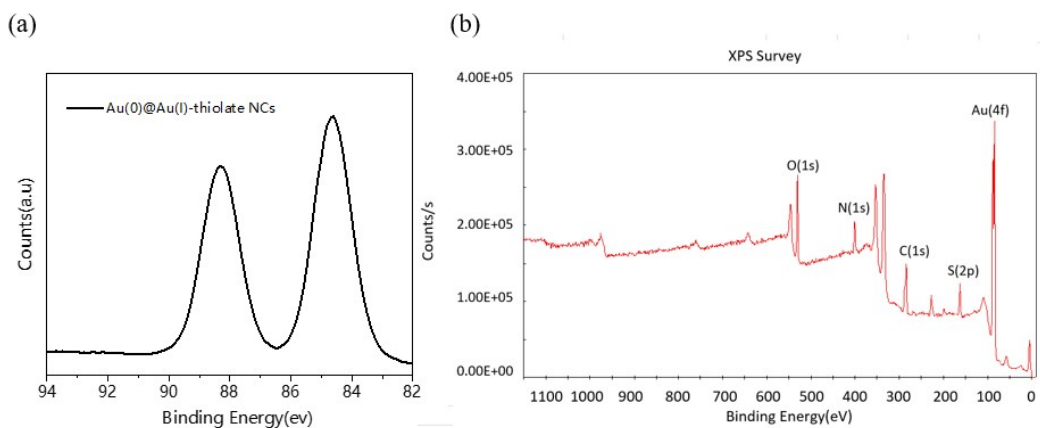

**Fig. S2.** (a) Au 4f X-ray photoelectron spectra of Cys-Au NCs. (b) The whole XPS spectrum of Cys-Au NCs.

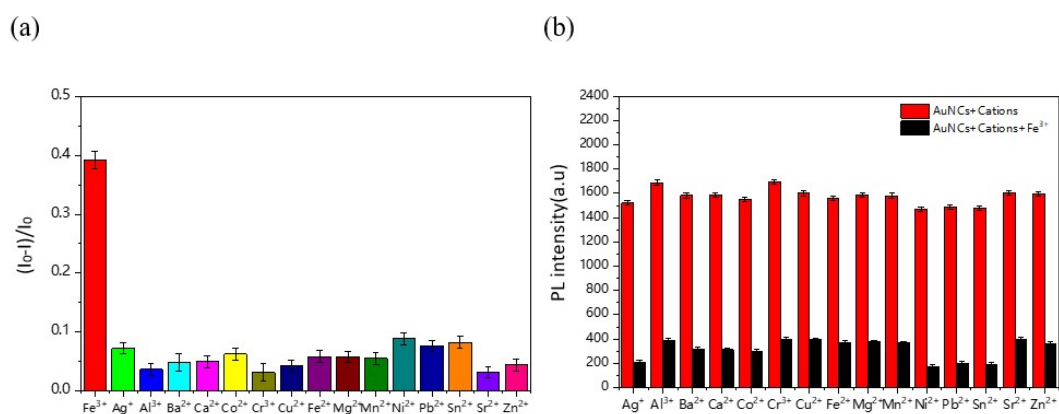

**Fig. S3.** (a) Selectivity investigation of Cys-Au NCs fluorescent probes towards Fe<sup>3+</sup> against other 15 kinds of metal ions. (Each sample was spiked with 10  $\mu$ L of various metal ions at 100  $\mu$ mol  $\diamond$  L<sup>-1</sup>). (b) Fluorescence intensity in response to Fe<sup>3+</sup> after the addition of other metal cations (ten-fold concentration) to the fluorescent probe Cys-Au NCs.

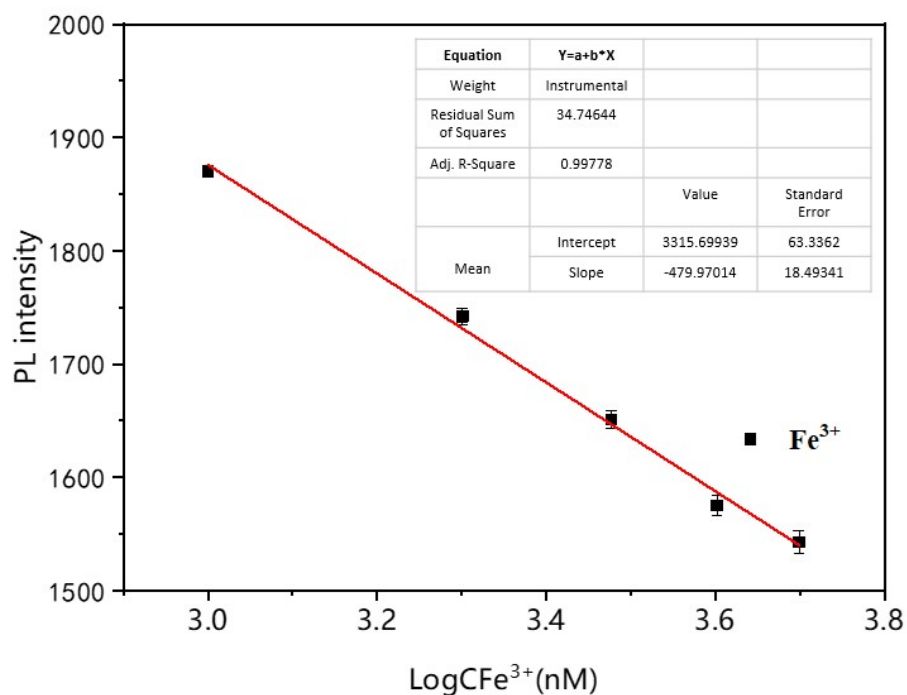

**Fig. S4.** The linear region of PL intensity of Cys-Au NCs upon the addition of different amounts of Fe<sup>3+</sup>.

|                                 |                   |
|---------------------------------|-------------------|
| Standard deviation ( $\sigma$ ) | 1.788             |
| Slope (m)                       | $4.8 \times 10^8$ |
| LOD                             | 11 nM             |
| LOQ                             | 37 nM             |

**Tab. S1.** LOD and LOQ of Cys-Au NCs for Fe<sup>3+</sup>.

| Nanosensors             | Linear range           | Detection limit    |
|-------------------------|------------------------|--------------------|
| Au NCs@PTMP-PMAA[1]     | 5-160 $\mu\text{M}$    | 3.0 $\mu\text{M}$  |
| Au NCs@L-tryptophan[2]  | 1-500 $\mu\text{M}$    | 0.16 $\mu\text{M}$ |
| Au NCs @GHRP- 6 2-[3]   | 2-1000 $\mu\text{M}$   | 1.4 $\mu\text{M}$  |
| Au NCs @11-MUA[4]       | 0.8-11 $\mu\text{M}$   | 0.5 $\mu\text{M}$  |
| Au NCs @L-histidine-[5] | 1-1000 $\mu\text{M}$   | 0.6 $\mu\text{M}$  |
| Cys-Au NCs              | 0.1-2000 $\mu\text{M}$ | 0.01 $\mu\text{M}$ |

**Tab. S2.** Performance comparison of gold nanoclusters luminescent nanosensors for the detection of  $\text{Fe}^{3+}$ .

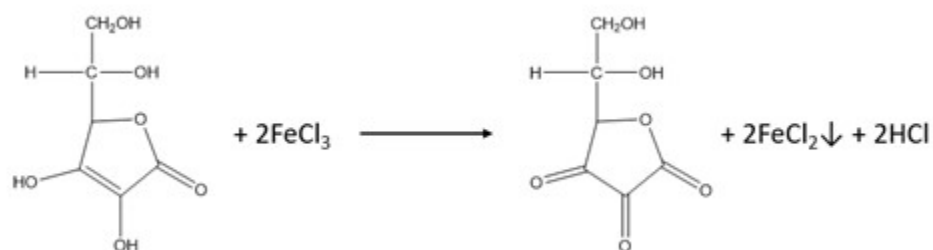

**Fig. S5.** Reaction equation for the oxidation of ascorbic acid with  $\text{Fe}^{3+}$ .

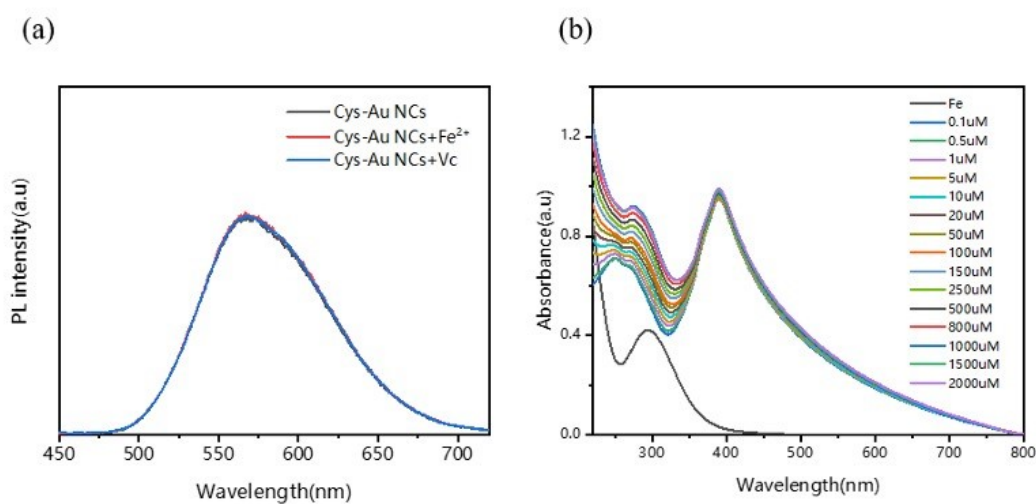

**Fig. S6.** (a) Fluorescence emission spectra of Cys-Au NCs (black line) in the presence of 1 mM Fe<sup>2+</sup> (red line) and 1 mM ascorbic acid (blue line). (b) UV-Vis absorption spectra of Cys-Au NCs with addition of Fe<sup>3+</sup>.

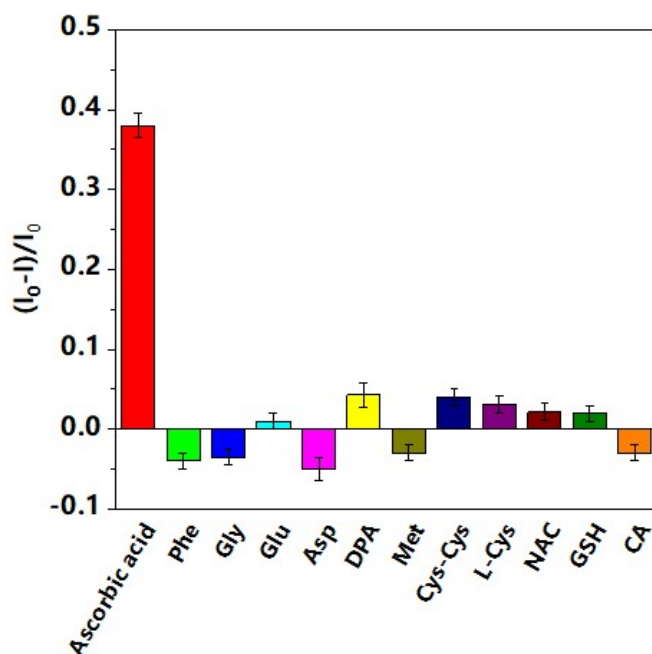

**Fig. S7.** Selectivity of the fluorescent probe Cys-Au NCs/Fe<sup>3+</sup> for ascorbic acid. (The addition concentration of each sample was 100 μmol L<sup>-1</sup>.)

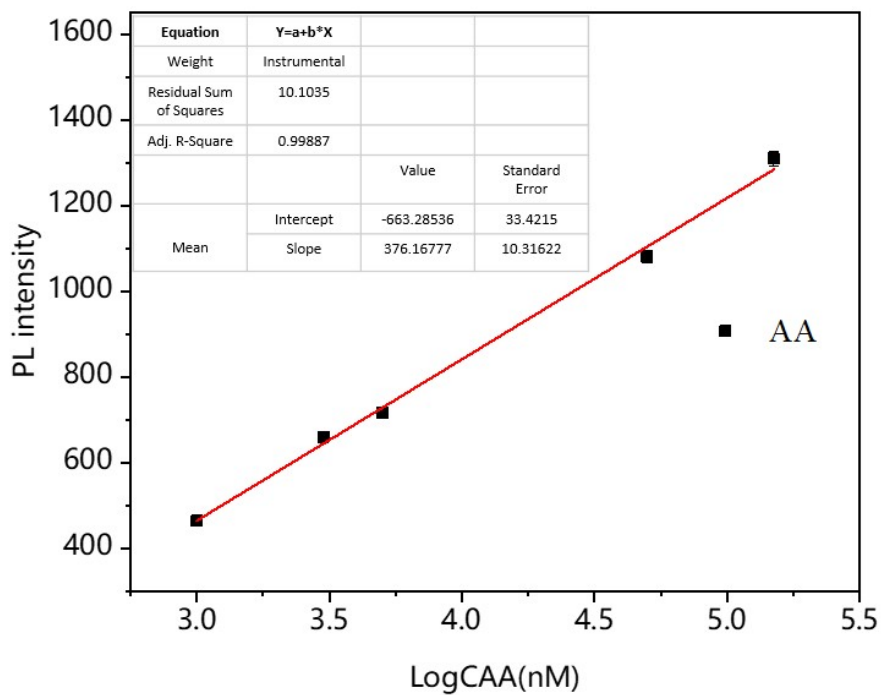

**Fig. S8.** The linear region of PL intensity of Cys-Au NCs/Fe<sup>3+</sup> with the addition of different amounts of AA.

|                                 |                   |
|---------------------------------|-------------------|
| Standard deviation ( $\sigma$ ) | 1.788             |
| Slope (m)                       | $3.8 \times 10^8$ |
| LOD                             | 14 nM             |
| LOQ                             | 47 nM             |

**Table S3.** LOD and LOQ of Cys-Au NCs/ Fe<sup>3+</sup> for AA

| Method                                                        | Linear range       | Detection limit |
|---------------------------------------------------------------|--------------------|-----------------|
| CQDs-MnO <sub>2</sub> [6]                                     | 0.18–90 $\mu$ M    | 42 nM           |
| CQDs/AuNCs/Cd <sup>2+</sup> [7]                               | 0.15–15 $\mu$ M    | 0.105 $\mu$ M   |
| MOF-5/3D-KSC<br>electrodes[8]                                 | 0.7 $\mu$ M–115 mM | 0.24 $\mu$ M    |
| GSH-AuNCs/H <sub>2</sub> O <sub>2</sub> /Fe <sup>2+</sup> [9] | 5–100 $\mu$ M      | 5 $\mu$ M       |
| BSA-AuNCs [10]                                                | 1.5–10 $\mu$ M     | 0.2 $\mu$ M     |
| AuNCs-PbS-QDs [11]                                            | 3–40 $\mu$ M       | 1.5 $\mu$ M     |
| MnO <sub>2</sub> -Modified GCPE[12]                           | 2.64–1500 $\mu$ M  | 0.8 $\mu$ M     |
| CoOOH-Modified TPNPs[13]                                      | 1–20 $\mu$ M       | 170 nM          |
| Colorimetry[14]                                               | 0.25–50.0 M        | 79.2 nM.        |
| BSA–AgNCs[15]                                                 | 2.0–50.0 $\mu$ M   | 0.16 $\mu$ M    |
| CuNCs[16]                                                     | 0.5–10 $\mu$ M     | 0.11 $\mu$ M.   |
| PSS-rGO[17]                                                   | 0.8–60 $\mu$ M     | 0.15 $\mu$ M    |
| Ag-CDs[18]                                                    | 0.2–60 $\mu$ M     | 0.25 $\mu$ M    |
| Au nanoparticles-DNA[19]                                      | 1–15 $\mu$ M       | 0.3 $\mu$ M     |
| Fe <sup>3+</sup> @TPN-AuAg NCs[20]                            | 0.2–80 $\mu$ M     | 0.06 $\mu$ M    |
| Cys-Au NCs/Fe <sup>3+</sup>                                   | 0.2-1000 $\mu$ M   | 0.01 $\mu$ M    |

**Tab. S4.** Comparison of the performances of different ascorbic acid detections.

## References

- [1] Zhang, J., Cai, C., Razzaque, S., Hussain, I., Lu, Q. W., & Tan, B., Synthesis of water-soluble and highly fluorescent gold nanoclusters for Fe<sup>3+</sup> sensing in living cells using fluorescence imaging, *Journal of Materials Chemistry B*. 5.28 (2017) 5608-5615.
- [2] Zheng, S., Yin, H., Li, Y., Bi, F., & Gan, F., One-step synthesis of L-tryptophan-stabilized dual-emission fluorescent gold nanoclusters and its application for Fe<sup>3+</sup> sensing, *Sensors and Actuators B: Chemical*. 242 (2017) 469-475.
- [3] Li, H., Huang, H., Feng, J. J., Luo, X., Fang, K. M., Wang, Z. G., & Wang, A. J., A polypeptide-mediated synthesis of green fluorescent gold nanoclusters for Fe<sup>3+</sup> sensing and bioimaging, *Journal of colloid and interface science*. 506 (2017) 386-392.
- [4] Bai, Z., Ren, X., Gong, Z., Hao, C., Chen, Y., Wan, P., & Meng, X., 11-Mercaptoundecanoic acid functionalized gold nanoclusters as fluorescent probes for the sensitive detection of Cu<sup>2+</sup> and Fe<sup>3+</sup> ions, *Chinese Chemical Letters*. 28.9 (2017) 1901-1904.
- [5] Su, Y., Qi, L., Mu, X., & Wang, M., A fluorescent probe for sensing ferric ions in bean sprouts based on L-histidine-stabilized gold nanoclusters, *Analytical Methods*. 7.2 (2015) 684-689.
- [6] Liu, J., Chen, Y., Wang, W., Feng, J., Liang, M., Ma, S., & Chen, X., "Switch-on" fluorescent sensing of ascorbic acid in food samples based on carbon quantum dots-MnO<sub>2</sub> probe, *Journal of agricultural and food chemistry*. 64.1 (2016) 371-380.
- [7] Niu, W. J., Shan, D., Zhu, R. H., Deng, S. Y., Cosnier, S., & Zhang, X. J., Dumbbell-shaped carbon quantum dots/AuNCs nanohybrid as an efficient ratiometric fluorescent probe for



sensing cadmium (II) ions and l-ascorbic acid, *Carbon*. 96 (2016) 1034-1042.

- [8] Song, Y., Gong, C., Su, D., Shen, Y., Song, Y., & Wang, L., A novel ascorbic acid electrochemical sensor based on spherical MOF-5 arrayed on a three-dimensional porous carbon electrode, *Analytical Methods*. 8.10 (2016) 2290-2296.
- [9] Hu, L., Deng, L., Alsaieri, S., Zhang, D., & Khashab, N. M., "Light-on" sensing of antioxidants using gold nanoclusters, *Analytical chemistry*. 86.10 (2014) 4989-4994.
- [10] Shojaeifard, Z., Hemmateenejad, B., & Shamsipur, M., Efficient on-off ratiometric fluorescence probe for cyanide ion based on perturbation of the interaction between gold nanoclusters and a copper (II)-phthalocyanine complex, *ACS Applied Materials & Interfaces*. 8.24 (2016) 15177-15186.
- [11] Wang, X., Wu, P., Hou, X., & Lv, Y., An ascorbic acid sensor based on protein-modified Au nanoclusters, *Analyst*. 138.1 (2013) 229-233.
- [12] Çevik, S., Akpolat, O., & Anik, Ü., Ascorbic acid detection with MnO<sub>2</sub>-modified GCPE, *Food analytical methods*. 9.2 (2016) 500-504.
- [13] Xu, P., Li, R., Tu, Y., & Yan, J., A gold nanocluster-based sensor for sensitive uric acid detection, *Talanta*. 144 (2015) 704-709.
- [14] Peng, J., Ling, J., Zhang, X. Q., Zhang, L. Y., Cao, Q. E., & Ding, Z. T., A rapid, sensitive and selective colorimetric method for detection of ascorbic acid, *Sensors and Actuators B: Chemical*. 221 (2015) 708-716.
- [15] Li, Y., Chen, Y., Huang, L., Ma, L., Lin, Q., & Chen, G., A fluorescent sensor based on ovalbumin-modified Au nanoclusters for sensitive detection of ascorbic acid, *Analytical Methods*. 7.10 (2015) 4123-4129.

- [16] Zhao, P., He, K., Han, Y., Zhang, Z., Yu, M., Wang, H., ... & Yao, S., Near-infrared dual-emission quantum dots–gold nanoclusters nanohybrid via co-template synthesis for ratiometric fluorescent detection and bioimaging of ascorbic acid in vitro and in vivo, *Analytical chemistry*. 87.19 (2015) 9998-10005.
- [17] Chen, J., Ge, J., Zhang, L., Li, Z., Li, J., Sun, Y., & Qu, L., Reduced graphene oxide nanosheets functionalized with poly (styrene sulfonate) as a peroxidase mimetic in a colorimetric assay for ascorbic acid, *Microchimica Acta*. 183.6 (2016) 1847-1853.
- [18] Tian, T., Zhong, Y., Deng, C., Wang, H., He, Y., Ge, Y., & Song, G., Brightly near-infrared to blue emission tunable silver-carbon dot nanohybrid for sensing of ascorbic acid and construction of logic gate, *Talanta*. 162 (2017) 135-142.
- [19] Zhang, L. P., Hu, B., & Wang, J. H., Label-free colorimetric sensing of ascorbic acid based on Fenton reaction with unmodified gold nanoparticle probes and multiple molecular logic gates, *Analytica chimica acta*. 717 (2012) 127-133.
- [20] Yang, X., Yang, J., Zhang, M., Wang, Y., Zhang, B., & Mei, X., Tiopronin protected gold-silver bimetallic nanoclusters for sequential detection of Fe<sup>3+</sup> and ascorbic acid in serum, *Microchemical Journal*. 174 (2022) 107048.
